# Supplementary material for: Characterization of maleimide dimers in photo-cross-linked copolyimide films
Source: Royal Society of Chemistry journal article supplement (doi:10.1039/c2cp23355j), 2012-01-01
Supplement: c2cp23355j.pdf [file c2cp23355j.pdf]

S1

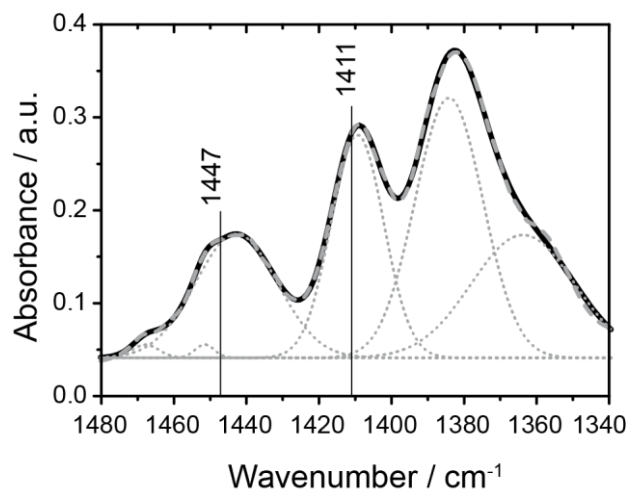

Figure S1: Deconvolution of the absorbance spectrum of the copolyimide with MI by six Gauss curves. The sum of the Gauss curves is depicted in grey, the experimental absorbance spectrum in black.
